# Supplementary material for: Zika Virus Infection in a Cohort of Pregnant Women with Exanthematic Disease in Manaus, Brazilian Amazon
Source: MDPI journal article supplement (doi:10.3390/v12121362), 2020-11-28
Supplement: s1 [file s1]

## Supplementary Martereials

**Table S1.** Characteristics of a cohort of pregnant women with exanthematic disease during the period when Zika virus transmission was most intense in Manaus, according to the results of RT-PCR ZIKV testing.

|                                 |                   |                   | RT-ZIKV results  | RT-ZIKV under   |                 |
|---------------------------------|-------------------|-------------------|------------------|-----------------|-----------------|
|                                 | RT-ZIKV+          | RT-ZIKV–          | indeterminate    | analysis        | Not tested      |
| Characteristic                  | ( <i>n</i> = 322) | ( <i>n</i> = 372) | ( <i>n</i> = 54) | ( <i>n</i> = 6) | ( <i>n</i> = 8) |
| MATERNAL AGE AT INFECTION       |                   |                   |                  |                 |                 |
| Maternal age (years), mean ± SD | 27.0 ± 6.4        | 27.6 ± 6.3        | 27.2 ± 7.4       | 26.2 ± 5.7      | 30.3 ± 6.6      |
| <18 years old                   | 24 (7.5%)         | 23 (6.2%)         | 6 (11.1%)        | 0 (0.0%)        | 0 (0.0%)        |
| 18 to 29 years old              | 195 (60.6%)       | 214 (57.5%)       | 30 (55.6%)       | 5 (83.3%)       | 4 (50.0%)       |
| >29 to 35 years old             | 77 (23.9%)        | 98 (26.3%)        | 10 (18.5%)       | 1 (16.7%)       | 2 (25.0%)       |
| >35 years old                   | 26 (8.1%)         | 37 (10.0%)        | 8 (14.8%)        | 0 (0.0%)        | 2 (25.0%)       |
| MARITAL STATUS                  |                   |                   |                  |                 |                 |
| Single                          | 148 (46,0%)       | 164 (44.1%)       | 28 (51.9%)       | 3 (50.0%)       | 2 (25.0%)       |
| Married/stable union            | 169 (52.5%)       | 199 (53.5%)       | 25 (46.3%)       | 5 (50.0%)       | 6 (75.0%)       |
| Separated/divorced              | 1 (0.3%)          | 7 (1.9%)          | 1 (1.9%)         | 0 (0.0%)        | 0 (0.0%)        |
| Widow                           | 0 (0.0%)          | 1 (0.3%)          | 0 (0.0%)         | 0 (0.0)         | 0 (0.0%)        |
| Ignored                         | 4 (1.3%)          | 1 (0.3%)          | 0 (0.0%)         | 0 (0.0%)        | 0 (0.0%)        |
| SCHOOLING                       |                   |                   |                  |                 |                 |
| Without schooling               | 0 (0.0%)          | 0 (0.0%)          | 0 (0.0%)         | 0 (0.0%)        | 0 (0.0%)        |
| Fundamental                     | 49 (15.2%)        | 46 (12.4%)        | 9 (16.7%)        | 1 (16.7%)       | 1 (12.5%)       |
| High school                     | 185 (57.5%)       | 191 (51.3%)       | 27 (50.0%)       | 5 (83.3%)       | 3 (37.5%)       |
| Higher education                | 85 (26.4%)        | 132 (35.5)        | 18 (33.3)        | 0 (0.0%)        | 4 (50.0%)       |
| No information                  | 3 (1.0%)          | 3 (0.8%)          | 0 (0.0%)         | 0 (0.0%)        | 0 (0.0%)        |

|                                                                        |                    |                   |                    |                    |                    |
|------------------------------------------------------------------------|--------------------|-------------------|--------------------|--------------------|--------------------|
| GYNECOLOGICAL HISTORY                                                  |                    |                   |                    |                    |                    |
| Parity, Mean $\pm$ SD                                                  | 2.4 $\pm$ 1.5      | 2.3 $\pm$ 1.4     | 2.4 $\pm$ 1.3      | 2.7 $\pm$ 1.4      | 3.0 $\pm$ 1.4      |
| First pregnancy No. (%)                                                | 90 (28.1)          | 108 (29.0)        | 14 (25.9)          | 1 (16.7)           | 1 (12.5)           |
| Gestational age (weeks) at the infection                               |                    |                   |                    |                    |                    |
| Mean $\pm$ SD (weeks)                                                  | 22.7 $\pm$ 8.9     | 22.2 $\pm$ 9.8    | 23.9 $\pm$ 9.4     | 17.7 $\pm$ 9.4     | 16.9 $\pm$ 9.1     |
| $\leq 22$ weeks No. (%)                                                | 162 (50.3)         | 197 (53.0)        | 20 (37.0)          | 4 (66.7)           | 5 (62.5)           |
| 1 <sup>st</sup> . Trimester No. (%)                                    | 62 (19.3)          | 97 (26.1)         | 10 (18.5)          | 2 (33.3)           | 3 (37.5)           |
| 2 <sup>nd</sup> . Trimester No. (%)                                    | 146 (45.3)         | 148 (39.8)        | 22 (40.7)          | 4 (66.7)           | 3 (37.5)           |
| 3 <sup>rd</sup> . Trimester No. (%)                                    | 114 (35.4)         | 127 (34.1)        | 22 (40.7)          | 0 (0.0)            | 2 (25.0)           |
| ANTENATAL CARE                                                         |                    |                   |                    |                    |                    |
| Antenatal consultations at the time of the rash illness, mean $\pm$ SD | 3.6 $\pm$ 0.7      | 3.6 $\pm$ 0.7     | 3.7 $\pm$ 0.5      | 3.2 $\pm$ 1.2      | 3.8 $\pm$ 0.5      |
| Antenatal consultations at delivery, mean $\pm$ SD                     | 7.7 $\pm$ 5.8      | 7.5 $\pm$ 2.5     | 7.6 $\pm$ 2.6      | 8.0 $\pm$ 2.0      | 7.9 $\pm$ 2.2      |
| Birth weight, mean $\pm$ SD                                            | 3248.8 $\pm$ 575.1 | 330.5 $\pm$ 503.8 | 3212.6 $\pm$ 650.6 | 3540.2 $\pm$ 487.4 | 3306.2 $\pm$ 379.2 |
| Pregnancy age at birth, mean $\pm$ SD (weeks)                          | 38.7 $\pm$ 2.2     | 38.8 $\pm$ 1.9    | 38.8 $\pm$ 2.3     | 39.3 $\pm$ 1.2     | 39.0 $\pm$ 1.5     |
| CLINICAL CONDITION                                                     |                    |                   |                    |                    |                    |
| Days from the onset of symptoms to sample collection, mean $\pm$ SD    | 2.7 $\pm$ 3.0      | 3.8 $\pm$ 4.1     | 3.8 $\pm$ 3.6      | 8.0 $\pm$ 12.5     | 6.0 $\pm$ 3.9      |
| Fever, No. (%)                                                         | 119 (44.7)         | 153 (53.3)        | 23 (54.8)          | 1 (25.0)           | 6 (85.7)           |
| Rash, No. (%)                                                          | 273 (99.3)         | 275 (94.2)        | 48 (100.0)         | 5 (100.0)          | 5 (83.3)           |
| Pruritus, No. (%)                                                      | 249 (92.9)         | 256 (90.1)        | 47 (100.0)         | 4 (80.0)           | 5 (83.3)           |
| Headache, No. (%)                                                      | 114 (50.9)         | 146 (62.7)        | 18 (54.6)          | 3 (100.0)          | 6 (100.0)          |

|                                  |            |            |           |          |          |
|----------------------------------|------------|------------|-----------|----------|----------|
| Odynophagia, No. (%)             | 14 (6.7)   | 15 (8.0)   | 1 (3.2)   | 0 (0.0)  | 0 (0.0)  |
| Eye burning, No. (%)             | 102 (48.6) | 97 (47.6)  | 16 (48.5) | 1 (50.0) | 3 (60.0) |
| Ocular pruritus, No. (%)         | 26 (16.7)  | 20 (15.5)  | 1 (5.0)   | 0 (0.0)  | 1 (33.3) |
| Conjunctivitis, No. (%)          | 103 (49.3) | 89 (44.1)  | 15 (48.4) | 1 (50.0) | 2 (40.0) |
| Hand arthralgia, No. (%)         | 142 (65.1) | 124 (57.7) | 18 (56.3) | 1 (50.0) | 1 (60)   |
| Foot arthralgia, No. (%)         | 122 (56.5) | 112 (53.1) | 13 (41.9) | 1 (50.0) | 2 (40.0) |
| Other arthralgia, No. (%)        | 24 (14.8)  | 25 (18.1)  | 2 (10.0)  | 0 (0.0)  | 1 (50.0) |
| Hand edema, No. (%)              | 114 (55.3) | 68 (35.6)  | 11 (36.7) | 0 (0.0)  | 2 (50.0) |
| Foot edema, No. (%)              | 101 (49.5) | 70 (37.0)  | 12 (40.0) | 0 (0.0)  | 2 (50.0) |
| Asthenia/adynamia, No. (%)       | 79 (39.9)  | 82 (43.4)  | 17 (54.8) | 0 (0.0)  | 2 (50.0) |
| Myalgia, No. (%)                 | 106 (49.8) | 126 (56.5) | 15 (44.1) | 0 (0.0)  | 4 (66.7) |
| Vomiting, No. (%)                | 34 (17.0)  | 55 (26.6)  | 3 (9.4)   | 0 (0.0)  | 1 (20.0) |
| Diarrhea, No. (%)                | (18.8)     | (19.4)     | (12.1)    | (50.0)   | (20.0)   |
| Lymphadenopathies, No. (%)       | 16 (8.3)   | 12 (6.8)   | 1 (3.6)   | 0 (0.0)  | 0 (0.0)  |
| Vaginal bleeding, No. (%)        | 11 (5.5)   | 12 (6.3)   | 0 (0.0)   | 0 (0.0)  | 0 (0.0)  |
| Other bleeding, No. (%)          | 14 (7.0)   | 14 (7.5)   | 2 (6.9)   | 0 (0.0)  | 0 (0.0)  |
| Uterine contractions, No. (%)    | 40 (20.5)  | 33 (18.1)  | 5 (18.5)  | 0 (0.0)  | 2 (66.7) |
| Epidemiological contact, No. (%) | 111 (69.8) | 78 (58.2)  | 16 (76.2) | 0 (0.0)  | 1 (33.3) |
| OUTCOME OF PREGNANCY, <i>n</i>   | 322        | 372        | 54        | 6        | 8        |
| Intrauterine death. No. (%)      | 10 (3.1)   | 7 (1.9)    | 0 (0.0)   | 0 (0.0)  | 0 (0.0)  |
| Miscarriage, No. (%)             | 7 (2.2)    | 3 (0.8)    | 0 (0.0)   | 0 (0.0)  | 0 (0.0)  |
| Stillbirth, No. (%)              | 3 (0.9)    | 4 (1.1)    | 0 (0.0)   | 0 (0.0)  | 0 (0.0)  |
| Live born Baby LBB No.           | 312        | 365        | 54        | 6        | 8        |
| Microcephaly in LBB, No. (%)     | 6 (1.9)    | 1 (0.3)    | 0 (0.0)   | 0 (0.0)  | 0 (0.0)  |

|                           |           |          |          |         |         |
|---------------------------|-----------|----------|----------|---------|---------|
| Low birth weight, No. (%) | 21 (6.7)  | 24 (6.6) | 5 (9.3)  | 0 (0.0) | 0 (0.0) |
| Preterm delivery, No. (%) | 34 (10.9) | 29 (8.0) | 6 (11.1) | 0 (0.0) | 0 (0.0) |

RT-PCR: reverse transcription polymerase chain reaction; ZIKV: Zika virus; SD: standard deviation; LBB: live-born baby.

**Table S2.** Summary of symptoms for isolated infections detected in a cohort of pregnant women who had exanthematic disease during the period when Zika virus transmission was most intense in Manaus.

| Symptom              | ZIKV   | DENV    | Syphilis | HIV    | Toxoplasmosis | CMV     | HERPES  | PARVOV  | None   | Total  |
|----------------------|--------|---------|----------|--------|---------------|---------|---------|---------|--------|--------|
| Eye burning          | 50.30% | 66.67%  | 100.00%  | 0.00%  | 0.00%         | 100.00% | 50.00%  | 37.50%  | 48.33% | 49.41% |
| Hand arthralgia      | 67.42% | 45.45%  | 100.00%  | 50.00% | 66.67%        | 100.00% | 41.18%  | 25.00%  | 63.72% | 63.31% |
| Foot arthralgia      | 56.82% | 45.45%  | 0.00%    | 50.00% | 33.33%        | 100.00% | 35.29%  | 25.00%  | 58.37% | 55.68% |
| Asthenia adynamia    | 39.24% | 27.27%  | 0.00%    | 33.33% | 0.00%         | 100.00% | 50.00%  | 50.00%  | 42.56% | 41.01% |
| Headache             | 54.70% | 64.29%  | 50.00%   | 50.00% | 66.67%        | 0.00%   | 66.67%  | 62.50%  | 64.32% | 60.43% |
| Conjunctivitis       | 52.98% | 72.73%  | 100.00%  | 0.00%  | 50.00%        | 100.00% | 50.00%  | 25.00%  | 44.44% | 48.56% |
| Uterine contractions | 21.79% | 0.00%   | 0.00%    | 0.00%  | 50.00%        | 0.00%   | 18.75%  | 14.29%  | 19.89% | 20.00% |
| Diarrhea             | 19.14% | 10.00%  | 0.00%    | 33.33% | 0.00%         | 0.00%   | 23.53%  | 25.00%  | 18.54% | 18.83% |
| Odynophagia          | 4.24%  | 0.00%   | 0.00%    | 0.00%  | 0.00%         | 0.00%   | 5.88%   | 12.50%  | 7.73%  | 5.99%  |
| Hand edema           | 54.55% | 50.00%  | 0.00%    | 0.00%  | 0.00%         | 100.00% | 43.75%  | 37.50%  | 36.36% | 44.17% |
| Foot edema           | 49.39% | 50.00%  | 0.00%    | 0.00%  | 0.00%         | 100.00% | 37.50%  | 37.50%  | 38.78% | 43.00% |
| Rash                 | 99.14% | 100.00% | 100.00%  | 75.00% | 100.00%       | 100.00% | 100.00% | 100.00% | 94.70% | 96.71% |
| Fever                | 47.32% | 66.67%  | 100.00%  | 50.00% | 33.33%        | 100.00% | 55.56%  | 44.44%  | 55.13% | 52.38% |
| Lymphadenopathies    | 6.54%  | 11.11%  | 0.00%    | 0.00%  | 0.00%         | 0.00%   | 12.50%  | 0.00%   | 4.97%  | 5.90%  |
| Myalgia              | 50.58% | 63.64%  | 100.00%  | 66.67% | 33.33%        | 100.00% | 37.50%  | 50.00%  | 58.05% | 54.65% |
| Pruritus             | 93.81% | 100.00% | 100.00%  | 75.00% | 66.67%        | 100.00% | 100.00% | 100.00% | 90.71% | 92.39% |

|                  |        |        |        |        |       |       |       |        |        |        |
|------------------|--------|--------|--------|--------|-------|-------|-------|--------|--------|--------|
| Ocular pruritus  | 15.00% | 11.11% | 0.00%  | 0.00%  | 0.00% | 0.00% | 7.14% | 16.67% | 18.03% | 15.58% |
| Vaginal bleeding | 5.56%  | 0.00%  | 0.00%  | 33.33% | 0.00% | 0.00% | 0.00% | 0.00%  | 6.22%  | 5.54%  |
| Vomiting         | 16.77% | 30.00% | 50.00% | 66.67% | 0.00% | 0.00% | 6.25% | 12.50% | 25.70% | 21.58% |

ZIKV: Zika virus; DENV: Dengue virus; CMV: cytomegalovirus; HERPES: herpes virus.
